# Fast-Evolving Mitochondrial DNA in Ceriantharia: A Reflection of Hexacorallia Paraphyly?

Sérgio N. Stampar<sup>1,2\*</sup>, Maximiliano M. Maronna<sup>3</sup>, Marcelo V. Kitahara<sup>4</sup>, James D. Reimer<sup>5</sup>, André C. Morandini<sup>2</sup>

**1** Universidade Estadual Paulista “Júlio de Mesquita Filho”, Laboratório de Biologia Aquática - LABIA, Faculdade de Ciências e Letras de Assis, Departamento de Ciências Biológicas, Assis, São Paulo, Brazil, **2** Universidade de São Paulo, Instituto de Biociências, Departamento de Zoologia, São Paulo, São Paulo, Brazil, **3** Universidade de São Paulo, Instituto de Biociências, Departamento de Genética e Biologia Evolutiva, São Paulo, São Paulo, Brazil, **4** Universidade de São Paulo, Centro de Biologia Marinha, São Sebastião, São Paulo, Brazil, **5** Molecular Invertebrate Systematics and Ecology Laboratory, Faculty of Science, University of the Ryukyus, Nishihara, Okinawa, Japan

## Abstract

The low evolutionary rate of mitochondrial genes in Anthozoa has challenged their utility for phylogenetic and systematic purposes, especially for DNA barcoding. However, the evolutionary rate of Ceriantharia, one of the most enigmatic “orders” within Anthozoa, has never been specifically examined. In this study, the divergence of mitochondrial DNA of Ceriantharia was compared to members of other Anthozoa and Medusozoa groups. In addition, nuclear markers were used to check the relative phylogenetic position of Ceriantharia in relation to other Cnidaria members. The results demonstrated a pattern of divergence of mitochondrial DNA completely different from those estimated for other anthozoans, and phylogenetic analyses indicate that Ceriantharia is not included within hexacorallians in most performed analyses. Thus, we propose that the Ceriantharia should be addressed as a separate clade.

**Citation:** Stampar SN, Maronna MM, Kitahara MV, Reimer JD, Morandini AC (2014) Fast-Evolving Mitochondrial DNA in Ceriantharia: A Reflection of Hexacorallia Paraphyly? PLoS ONE 9(1): e86612. doi:10.1371/journal.pone.0086612

**Editor:** Michael Schubert, Laboratoire de Biologie du Développement de Villefranche-sur-Mer, France

**Received:** August 27, 2013; **Accepted:** December 12, 2013; **Published:** January 27, 2014

**Copyright:** © 2014 Stampar et al. This is an open-access article distributed under the terms of the Creative Commons Attribution License, which permits unrestricted use, distribution, and reproduction in any medium, provided the original author and source are credited.

**Funding:** This work was supported by Fundação de Amparo à Pesquisa do Estado de São Paulo (FAPESP) 2012/01771, Coordenação de Aperfeiçoamento de Pessoal de Nível Superior (CAPES, PROEX) through the Programa de Pós-Graduação em Zoologia do Departamento de Zoologia IB-USP and Conselho Nacional de Desenvolvimento Científico e Tecnológico - Universal 481549/2012-9 to SNS and JDR was supported by the Rising Star Program and the International Research Hub Project for Climate Change and Coral Reef/Island Dynamics at the University of the Ryukyus. This work was partly supported by grants 2012/01771 (SNS), 2010/50174-7 (ACM), 2006/56211-6(MMM) and 2011/17537 (MVK), São Paulo Research Foundation (FAPESP). The funders had no role in study design, data collection and analysis, decision to publish, or preparation of the manuscript.

**Competing Interests:** The authors have declared that no competing interests exist.

\* E-mail: stampar@assis.unesp.br

## Introduction

“DNA barcoding” is the usage of a standardized DNA region not only as a tool for fast and reliable identification of known species, but also to assist the detection of undescribed species [1]. Researchers utilize a short DNA sequence (~700 bp) from the mitochondrial protein-coding gene cytochrome c oxidase subunit I (COI) that differs by several percent between even closely metazoan related species as an adequate “barcode” to distinguish species. Since then, the COI region has been widely used for DNA barcoding in many Metazoa, including cnidarians (see more in [2]). However, within cnidarians, the effectiveness of this marker as a species-level barcode is purported to be limited to Medusozoa [3] as it has levels of divergence (Kimura 2-Parameter, K2-P) within congeners greater than 20% in Medusozoa [2], while this divergence hardly exceeds 5% within anthozoan congeners [3–4]. Furthermore, other mitochondrial DNA markers broadly used – such as mitochondrial 16S rDNA – also have divergence values among anthozoan congeners significantly lower than those verified for medusozoans [3]. As such, it appears that the anthozoan mitochondrial molecular clock, most probably as a result of a mismatch repair system - e.g. a *MutS*-like protein encoded by the mt genomes of a number of octocorals [5–9], is slower than in most Metazoa. This low evolutionary rate has been inferred as an ancestral condition [3]; [10–11], although there is no evidence of

this mismatch repair system in Hexacorallia mitochondrial genomes, or in other eukaryotes [12].

Within the “orders” that traditionally compose the Hexacorallia, only Ceriantharia does not have a representative with a complete mitochondrial genome determined to date. Phylogenetic studies of cerianthids based on mitochondrial and nuclear markers have resulted in reconstructions divergent from those based on morphology [11]; [13–15]. Thus, Ceriantharia is an “*incertae sedis*” group [13] within Anthozoa. In general, the phylogenetic reconstruction of higher taxonomic levels (i.e. class, order) demands molecular markers with “low” mutation rates (e.g. less than 1% divergence/million years) [16]. Therefore, the long (28S) and short (18S) nuclear ribosomal genes have been purported to be adequate [17] if they are conserved enough to produce unambiguous alignments and to provide an appropriate phylogenetic signal to define basal relationships [18]. In this study, nearly complete sequences from 18 and 28S and partial 16S ribosomal genes were used to reconstruct the cnidarian evolutionary history, and specifically focus on the relative position of cerianthids within the phylum. In addition, the genetic divergences of mitochondrial markers (i.e. partial 16S and COI sequences) were defined, and compared between Ceriantharia and other cnidarian groups, indicating a “fast-evolving mtDNA profile” (based on medusozoan data) in the former. In general, this study adds to the development of a more cohesive evolutionary scenario for Ceriantharia, defines

a phylogenetic framework for Ceriantharia systematics, and proposes a new evolutionary scenario for the mutation history of mtDNA in the non-bilaterian Metazoa.

## Materials and Methods

### DNA Extraction, Polymerase Chain Reaction and Sequencing

Total DNA was extracted from individual cerianthid specimen tentacles (Table 1) using InstaGene® (Bio-Rad #732-6030) or the DNAdvance® kit (Agencourt® #A48705). PCR reactions and conditions followed under predefined conditions ([13]; primers used in the present study are listed in Table 2). Amplicons were purified using AMPure® kit (Agencourt® #A63881) following manufacturer's instructions, and made ready for sequencing using the BigDye® Terminator v3.1 kit (Applied Biosystems #4337455; same primers and T<sub>m</sub> temperature conditions as in PCR reactions). Sequencing was carried out on an ABI PRISM®3100 genetic analyzer (Hitachi), and resulting sequences were assembled and edited using Geneious™ 5.4.4 (Table 1). Ceriantharia sequences from mitochondrial (COI, 16S) and nuclear (18S, 28S) molecular markers were obtained from 12 of the 50 taxonomically recognized species [28].

### Mitochondrial Evolutionary Divergence between Ceriantharia Species and Genera

Evolutionary distances of mitochondrial (16S rDNA and COI) genes from Ceriantharia were analyzed within congeners (*Isarachnanthus* – see Table 3) and between genera in MEGA5 software [29], using Kimura's two-parameter model of base substitution (K2-P) in order to calculate their respective genetic distances. In addition, K2-P genetic distances were also estimated for other anthozoan clades, and hydrozoans were considered as “outgroup” for discussion. The distances obtained for both mitochondrial markers are compiled in four graphs in two figures, of which one are from congeners (Figure 1), and another from species of different genera (Figure 2). The complete datasets, including sequences obtained from GenBank, are compiled in the supplementary material (Table S1).

**Table 2.** List of primers used to amplify/sequence Ceriantharia representatives in this study.

| Marker | Primers                                                    | T <sub>m</sub> | Reference      |
|--------|------------------------------------------------------------|----------------|----------------|
| COI    | LCO 1490+ HCO2198                                          | 49°            | [19]           |
|        | LCO 1490+ HCOout                                           | 48°            | [20]           |
|        | LCO 1490+ HCOcato                                          | 48°            | [21]           |
| 16S    | CB1+ CB2                                                   | 56°            | [22]           |
|        | CB1+ R [BR]                                                | 54°            | [23]           |
|        | F1Mod+CB2                                                  | 56°            | [22]           |
| 18S    | 18C+18Y                                                    | 55°            | [24]           |
|        | 18A+18L                                                    | 55°            | [24]           |
|        | 18O+18B                                                    | 55°            | [24]           |
| 28S    | 5S-R635, F635-R1630, F1379-R2077, F2076-R2800, F2800-R3264 | 63°            | [25] [26] [27] |

doi:10.1371/journal.pone.0086612.t002

### Phylogenetic Inferences and Hypotheses Testing

Representing all accepted cnidarian clades except Myxozoa (*sensu* [11]; Text S1), 18S and 28S rDNAs sequences were used to reconstruct the cnidarian evolutionary history. In order to avoid the effects of an excess of missing entries on a combined analysis, each molecular marker was analyzed with a single gene analysis approach. In order to avoid any limitation on restricted results from a certain method of alignment and phylogenetic method, we analyzed our 18S and 28S datasets with several alignment methods, masking data and all standard phylogenetic reconstruction methods: (1) “static” defined homology applying consistency scores (MAFFT, [30]) and estimated secondary structure (RNAsalsa; [31]); (2) “dynamic” defined homology applying probabilistic approaches with indel model (Bali-Phy; [32]), gaps treated as missing data (MAFFT; [30] and OPAL; [33] in Saté; [34]), and

**Table 1.** List of Ceriantharia species included in the present study.

| Family        | Organism                             | Obtained sequences | GENBANK-DDBJ/BOLD Number                                                                                                                                |
|---------------|--------------------------------------|--------------------|---------------------------------------------------------------------------------------------------------------------------------------------------------|
| Arachnactidae | <i>Isarachnanthus bandanensis</i>    | 16S/COI            | <b>16S</b> - (JX125699) <b>COI</b> - (CMBIA097-11(BOLD))                                                                                                |
|               | <i>Isarachnanthus maderensis</i>     | 16S/COI/18S        | <b>16S</b> - (JX125670-72/79-80/82/85-87)/ <b>COI</b> - (JX128313-14/22-23/25/28-33)/ <b>18S</b> - AB859825                                             |
|               | <i>Isarachnanthus nocturnus</i>      | 16S/COI/28S/18S    | <b>16S</b> - (JX125669/73-78/81/83-84/88-89/91-98)/ <b>COI</b> - (JF915196-97/JX128315-21/24/26/27/34-42)/ <b>18S</b> - AB859826/ <b>28S</b> - AB859832 |
| Cerianthidae  | <i>Ceriantheomorpha brasiliensis</i> | 16S/COI/18S/28S    | <b>16S</b> - JF915193/ <b>COI</b> - JF915195/ <b>18S</b> - AB859823/ <b>28S</b> - AB859831                                                              |
|               | <i>Ceriantheopsis americanus</i>     | 16S/COI            | <b>16S</b> - AB859834/ <b>COI</b> - AB859839                                                                                                            |
|               | <i>Cerianthus membranaceus</i>       | 16S/COI/18S        | <b>16S</b> - AB859837/ <b>COI</b> - AB859843/ <b>18S</b> - AB859824                                                                                     |
|               | <i>Cerianthus lloydii</i>            | 16S/COI            | <b>16S</b> - AB859838/ <b>COI</b> AB859844                                                                                                              |
|               | <i>Pachycerianthus sp.1</i>          | 16S/COI/18S/28S    | <b>16S</b> - AB859835/ <b>COI</b> - AB859840/ <b>18S</b> - AB859829/ <b>28S</b> - AB859833                                                              |
|               | <i>Pachycerianthus borealis</i>      | 16S                | <b>16S</b> - U40288                                                                                                                                     |
|               | <i>Pachycerianthus magnus</i>        | 16S/COI/18S        | <b>16S</b> - AB859836/ <b>COI</b> - AB859841/ <b>18S</b> - AB859828                                                                                     |
|               | <i>Pachycerianthus fimbriatus</i>    | COI/18S            | <b>COI</b> - AB859842/ <b>18S</b> - AB859827                                                                                                            |

doi:10.1371/journal.pone.0086612.t001

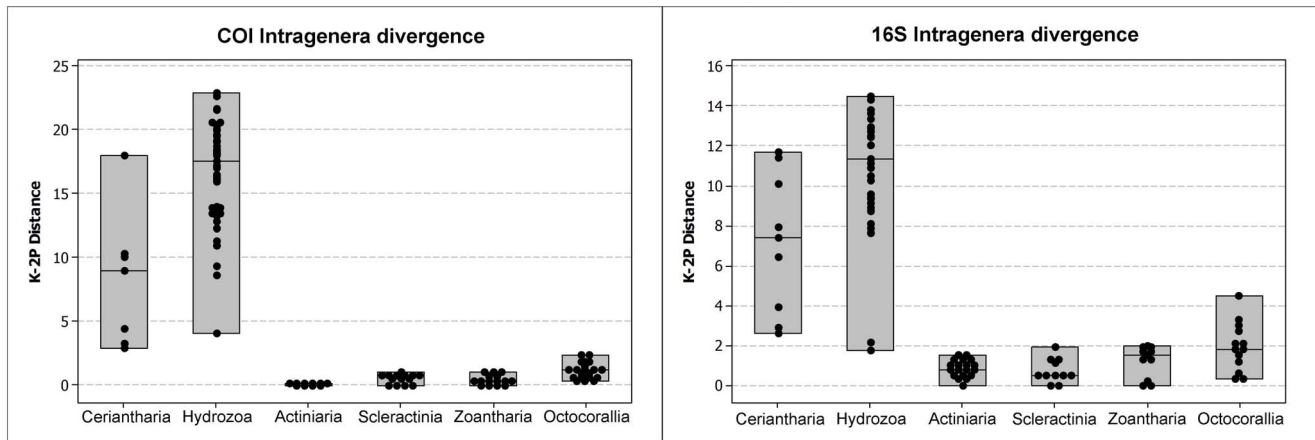

**Figure 1. Estimates of evolutionary divergence in major Anthozoan lineages from mitochondrial molecular markers (intra-generic level, Hydrozoa considered as an outgroup for discussion).** Right graph: estimates of evolutionary divergence (Kimura 2-parameter model) of COI among congeners of Ceriantharia (n=9), Hydrozoa (n=10), Actiniaria (n=5), Scleractinia (n=7), Zoantharia (n=7) and Octocorallia (n=6), (n=number of species examined). Left graph: estimates of evolutionary divergence (Kimura 2-parameter model) of 16S ribosomal DNA among congeners of Ceriantharia (n=9), Hydrozoa (n=11), Actiniaria (n=9), Scleractinia (n=7), Zoantharia (n=6) and Octocorallia (n=6), (n=number of species examined).  
doi:10.1371/journal.pone.0086612.g001

through several transformation costs in parsimony (POY; [35]). To consider the possible influence of gaps, and because some positions with noise signal in molecular datasets may result in topologies with phylogenetic artifacts, we made extra datasets for analyses: (1) gaps coded as an additional binary datamatrix (for probabilistic based methods; Fastgap; [36]) and (2) highly variable positions were detected as potentially noisy positions, and were masked (filtered) using Aliscore [37].

Considering the phylogenetic reconstructions methods, we analyzed the datasets under Maximum Likelihood (RAxML, Saté; [38]; [34]), Bayesian inference [MrBayes, Bali-Phy; [39], [32]) and Maximum Parsimony (TNT, POY; [40], [35]; see Text S1 and for Table S3 for full parameters information on all thirteen phylogenetic reconstructions' approaches.) To evaluate nodal support and to detect if support values were biased, two parametric (aLRT and aBAYES) and two non-parametric

(Bootstrap, BS and SH-aLRT) techniques were applied in MAFFT+RAxML results [38]; [41]). Bootstrap values were computed on RAxML v7.3.2 (500 pseudoreplicates, same parameters as the original phylogenetic analysis) and additional statistical tests were performed using PhyML v3.0.1 [42]; [43]) under the same parameters as the original MAFFT+RAxML inferences (Figure 3). As additional datasets, representing mitochondrial DNA we analyzed partial sequences from the mitochondrial ribosomal gene 16S for 63 cnidarian species with outgroups as used in previous works (see Text S1, Table S1 and Table S2) for final rooting, and a dataset including two extra Ctenophora species for final outgroup consideration (both analyses with no masking option). Sequences were aligned in MAFFT (parameter: auto), phylogeny estimated in RAxML (GTR DNA model, 125 replicates) and support values estimated as in 18S and 28S studies. A combined dataset was created for 18S and 16S

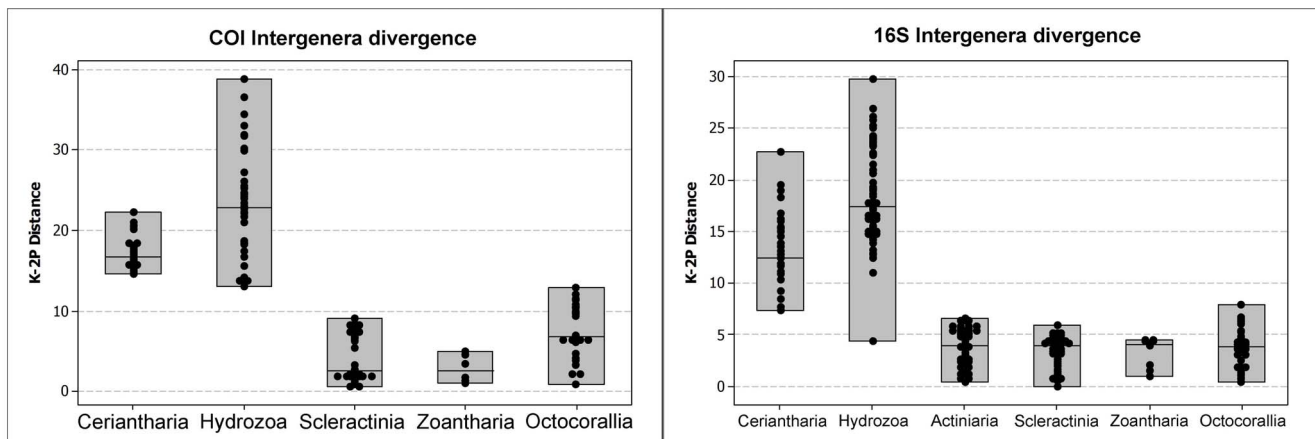

**Figure 2. Estimates of evolutionary divergence in major Anthozoan lineages (intergenera level, Hydrozoa considered as outgroup for discussion) from mitochondrial molecular markers.** Right graph: estimates of evolutionary divergence (K2-P) of COI between species of different genera in Ceriantharia (n=8), Hydrozoa (n=12), Scleractinia (n=10), Zoantharia (n=4) and Octocorallia (n=8) (n=number of species examined). Left graph: estimates of evolutionary divergence (Kimura 2-parameter model) of 16S ribosomal DNA between species of different genera in Ceriantharia (n=9), Hydrozoa (n=13), Actiniaria (n=12), Scleractinia (n=11), Zoantharia (n=5) and Octocorallia (n=11) (n=number of species).  
doi:10.1371/journal.pone.0086612.g002

**Table 3.** Estimates of average evolutionary divergence over sequence pairs within *Isarachnautus* representatives.

| Molecular Marker | Species              | Sample Size | Within Species |       | Between Species |      |
|------------------|----------------------|-------------|----------------|-------|-----------------|------|
|                  |                      |             | <i>d</i> (%)   | S.E.  | <i>d</i> (%)    | S.E. |
| 16S              | <i>I. maderensis</i> | 9           | 0.5            | 0.002 | 6.0             | 0.01 |
|                  | <i>I. nocturnus</i>  | 20          | 0.0            | 0.000 |                 |      |
| COI              | <i>I. maderensis</i> | 11          | 0.0            | 0.000 | 8.9             | 0.01 |
|                  | <i>I. nocturnus</i>  | 21          | 0.1            | 0.000 |                 |      |

The number of base substitutions per site from averaging over all sequence pairs within each group is shown. *d* – Distance in % and S.E. – Standard error estimates were obtained by a bootstrap procedure (500 replicates).

doi:10.1371/journal.pone.0086612.t003

sequences, with basic similar results to single gene 16S analysis (see Table S1 and Figure 3 and Figure S1 for sampled species and phylogenetic results). Different data treatment and phylogenetic analysis approaches were additionally tested on a COI dataset, but no major recognizable cnidarian clades were recovered (these results were not included in our main results; see Figure S2 and Figure S3 for results and analyses' details).

To analyze the phylogenetic signal profile along the recovered phylogenies in figure 3, the net approach test was performed using PhyDesign (Figure 4; [44]). Finally, to test alternative systematic proposals and our own main results, considering the phylogenetic position of Ceriantharia, we computed AU and other phylogenetic hypothesis tests using consel ([45]; same input datasets and results from the MAFFT+RAxML analysis; Table 4).

## Results

### Mitochondrial Genetic Diversity

While the genetic distance estimates for COI and 16S within Ceriantharia congeners ranged from 3 to 17% and 3 to 12%, respectively (Figures 1 and 2), values for all other anthozoan groups excepting Octocorallia were estimated to be less than 1% (COI) to 2% (16S). Octocorallian congeners slightly exceeded these values, with approximately 2% and 4% divergences within COI and 16S sequences, respectively. In general, the divergence values estimated for ceriantharians showed a range most similar to those from hydrozoans (medusozoan example) (intrageneric divergence: COI/16S 3–17%/3–12% (Ceriantharia) and 4–23%/2–14% (Hydrozoa)). Furthermore, the estimated COI genetic divergence between genera in every major anthozoan group (Octocorallia and Hexacorallia) was lower than the divergence observed for ceriantharian congeners. Most anthozoans had intergeneric divergences below 10% while the estimated divergence in ceriantharians was between 14 and 22% (Figure 3). However, the calculated 16S divergence between species of different genera showed less difference between Ceriantharia and other anthozoans, as observed values in Ceriantharia ranged from 7 to 23%, while other anthozoan groups ranged from 0 to 7%.

An example of the genetic divergence of related congeneric species is the divergence values of *Isarachnautus* spp. in the Atlantic Ocean (= 6–9%), which are higher than levels reported from similar comparisons in other anthozoans. The estimated divergence between several specimens of *I. nocturnus* and *I. maderensis* was based on multiple specimens and is considered reliable (Table 3).

### Phylogenetic Position of Ceriantharia

The final alignments consisted of 73 (18S rDNA), 63 (mitochondrial 16S rDNA) and 25 (28S rDNA) cnidarian species,

with 1992, 1184 and 3013 positions, respectively (MAFFT results). Instead of Porifera, Ctenophora was chosen as outgroup in all studies, as fewer gaps were required in order to align their sequences together with cnidarian sequences.

Results of the phylogenetic reconstructions are shown in Figures 3 and 5 and summarized below.

Both 18S and 28S genes recovered monophyletic Anthozoa and Medusozoa with a sister relationship in almost all results (Figures 3 and 4), although the Hexacorallia monophyly suffered due to Ceriantharia's relative position. In most 18S reconstructions, all anthozoan and medusozoan lineages (i.e. Octocorallia, Hexacorallia, Scyphozoa, Staurozoa, Cubozoa, and Hydrozoa) were recovered as monophyletic groups. However, Ceriantharia was recovered as a sister group to Anthozoa, or in some cases, as a sister group of Cnidaria (Table 4). Ceriantharia, which has been taxonomically placed within Hexacorallia, was recovered as such only with dynamic homology with low CI and RI indexes if compared to other MP-POY topologies from the same dataset. A sister-like relationship between Ceriantharia and Octocorallia was also recovered in MP topologies where gaps were treated as missing data (TNT analysis), or in ML and MP with filtered datasets (RAxML and POY results; Table 4; except for these cases, Ceriantharia was recovered as a sister group to Cnidaria).

The monophyly of both Anthozoa and Medusozoa, and their respective major component groups, were also recovered using 28S rDNA (Figure 3, Table 4). However, in general, the main topology differed from that of 18S rDNA as Ceriantharia occupied a sister-like position to Octocorallia, with high statistical support in all but non-parametric bootstraps. MP topologies that recovered Ceriantharia as sister group of Hexacorallia (traditional placing) had several unexpected results – for example, non-monophyletic Scyphozoa and Staurozoa as sister groups of Hydrozoa. As in 18S rDNA, these MP topologies had lower CI and RI values compared to results using different methods (Table S2). The 16S dataset including two ctenophore sequences had a loss of monophyly of the Medusozoa group and some well-recognized cnidarian clades (e.g., Hydrozoa), with Ceriantharia grouped with the rest of the anthozoan lineages (but not as sister group of the rest of Hexacorallia), possibly representing a case of basal long branch attraction for portions of the sampled Hydrozoa and Ctenophora sequences. For the 16S dataset we rooted the 16S phylogeny considering Medusozoa and Anthozoa as monophyletic groups, and this analysis had highly similar results as to the 18S ML analysis and rooted with ctenophore sequences (Figure 3). It is important to note that the late definition of rooting does not affect analyses in ML studies nor phylogenetic relationships between the terminal trees. Due to better support values and more similar clade relationships for major cnidarian lineages with 18S and 28S results, we focused on the 16S dataset and their ML result that did

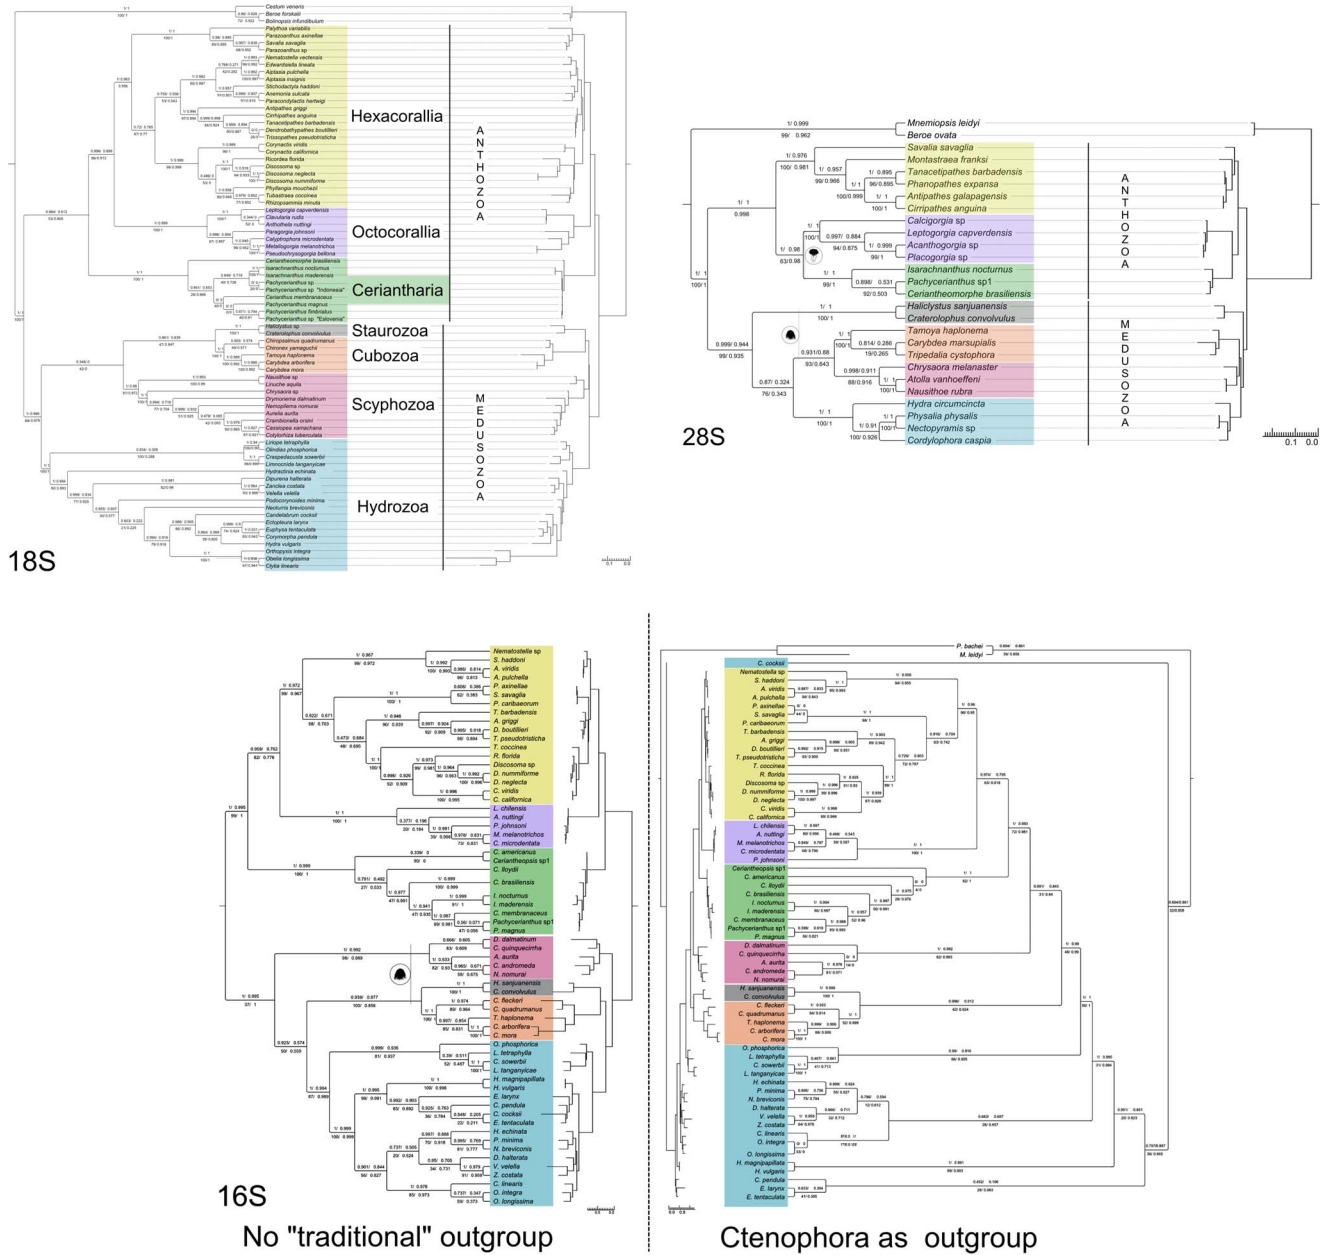

**Figure 3. ML phylogenies of Cnidaria based on ribosomal molecular markers 18S (upper left), 28S (upper right) and 16S datasets (lower center).** Major cnidarian lineages are in cladograms and phylograms for Medusozoa clades (Hydrozoa, Scyphozoa, Cubozoa, Staurozoa) and Anthozoa (Hexacorallia, Hexacorallia, with special emphasis with Ceriantharia (green)). Divergent results in the 18S phylogeny (considering the major clades) are shown in 16S (no Ctenophora sequences in analysis) and 28S trees (jellyfish icon for Medusozoa clades, polyp icon for Anthozoa clades). Supports values are aBAYES and aLRT (parametric, upper branch) together with BS and SH-like (non parametric, lower branch) in clockwise fashion. Each dataset was aligned in MAFFT and phylogeny estimated in RAxML; support values were calculated in RAxML (BS) and PhyML (aBAYES, aLRT and SH-like; see Table S2 for details in datamatrixes, software and parameters). doi:10.1371/journal.pone.0086612.g003

not include ctenophoran sequences for Consel and PhyDesign analysis. Consel recovered low support (negative significance value - less than 0.05 of p-value) for Ceriantharia as sister group of Hexacorallia compared to alternative systematic scenarios in both 18S and 16S analyses (Table 5). Based on PhyDesign outcomes, it is believed that the 28S rDNA has more phylogenetic signal than the 18S rDNA, and consequently is more adequate for Cnidaria higher rank reconstruction (Figure 4). However, it is important to note that these results may be biased due to the different number

of species included in each gene dataset (and consequently different number of epochs in each topology; Figure 4). Overall, our results from both nuclear and mitochondrial ribosomal gene analysis corroborate that Ceriantharia is a monophyletic and basal independent lineage, but indicates that it does not have a direct relationship to other hexacorallian orders. Thus, these results suggest that Ceriantharia should be ranked as a separate subclass within Anthozoa.

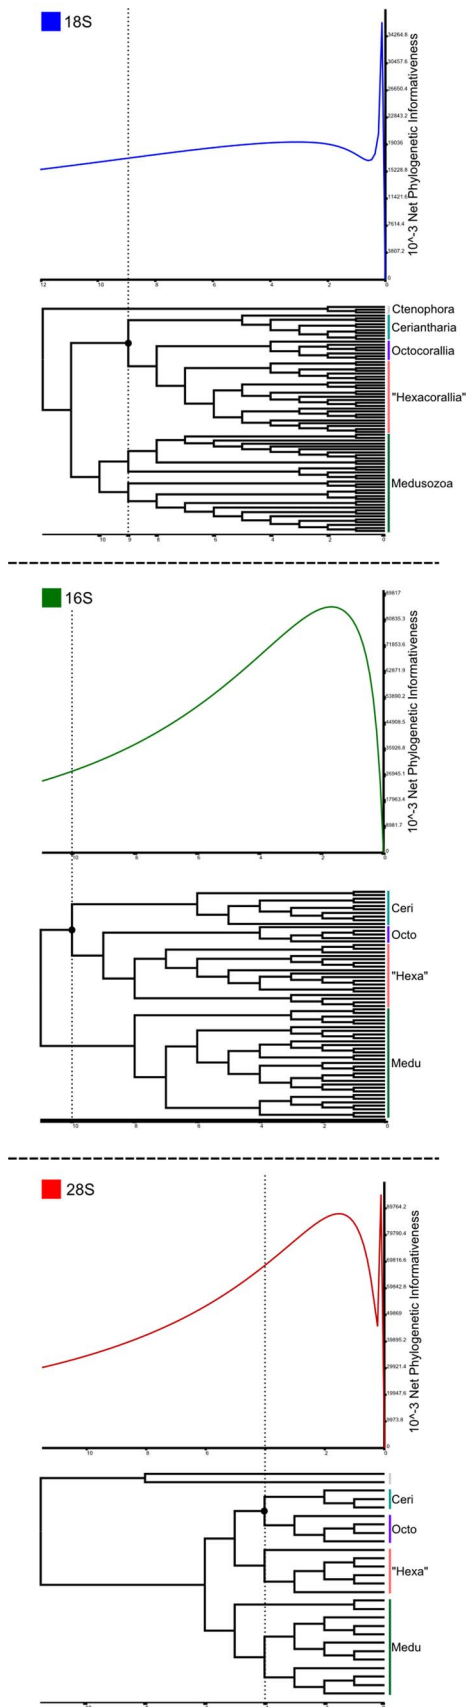

**Figure 4. Phydesign curves - Phylogenetic Informativeness profiles from the 18S, 16S (no Ctenophora sequences in analysis), and 28S datasets, computed with their original datasets and results from the MAFFT+RAxML results.** The x-axis represents topologies considering their nodes as epoch units, the y-axis represents the Net Phylogenetic Informativeness value for each molecular marker along the topologies.  
doi:10.1371/journal.pone.0086612.g004

## Discussion

### Anthozoan Phylogenetics and Genetic Divergence among Cnidarian Species and Genera

According to [3], “the tempo of evolution in anthozoan mitochondrial genes appears to be at least 10–20 times lower than the standard mitochondrial clock based on vertebrate sequences, which averages a sequence divergence of 1–2%/Myr [46–49]...”. With the use of a number of statistical methods, [50] also found that the anthozoan intra- and interspecific COI variations were  $\leq 6\%$  or invariant (in 98% of the analyzed species). The genetic divergence of ceriantharian mitochondrial markers would therefore be expected to follow the slow rate of differentiation as detected in other groups currently classified as anthozoans [51]. However, an overview of our results suggests a much faster rate. For both analyzed mitochondrial markers (COI and 16S rDNA), the genetic divergence rates estimated between Ceriantharia congeners are more similar to those from Hydrozoa than to Anthozoa, suggesting that the mitochondrial clock in Ceriantharia has almost the same divergence rate as in Medusozoa and other Bilateria groups (see also [13]).

Therefore, the above statement of slow mitochondrial evolution in Anthozoa is accurate only if **Ceriantharia is not included within Anthozoa classification**. In fact, this hypothesis is not unusual. Based on nuclear molecular markers, [15] and [11] showed that Ceriantharia is not within Hexacorallia. Another study also stressed that Ceriantharia could be a hexacorallian outgroup [52], but its position was not further discussed. In addition, analyses of complete mitochondrial genomes indicate that the phylogenetic position of Ceriantharia is unstable and not well defined (e.g. sister group of Hexacorallia) [53]. For discussion on the historical context of molecular data and Ceriantharia’s evolutionary position over the last twenty years see (Text S1).

More recently, however, a new body of data is changing the scenario previously proposed for the origin of the rapid evolution of mtDNA [50]. In summary, there are two most parsimonious explanations for the slow mtDNA evolution in anthozoans (see Figure 2 in [50]). However, both scenarios must be modified to accommodate the Ceriantharia results presented herein. The first scenario (Figure 5, reconstruction A) hypothesizes independent origins for the rapid evolution of mtDNA in Medusozoa and Bilateria. However, it is necessary to include an additional step (origin of the rapid evolution of mitochondrial DNA) before Ceriantharia, and consequently this reconstruction is no longer most parsimonious. In the second scenario (Figure 5, reconstruction B) there is no necessity to add an extra step, making it the most parsimonious scenario; namely that anthozoans (not including Ceriantharia) decreased their mtDNA rate of evolution.

Corroborating the findings from [15], the phylogenetic “uniqueness” of Ceriantharia in relation to anthozoans has major implications not only in basal metazoan mtDNA evolution but also in cnidarian evolutionary history. The inclusion of Ceriantharia data in molecular clock phylogenetic reconstructions may influence estimates for the appearance of Cnidaria. It may also have effects on the stability of the position of Cnidaria in broader

**Table 4.** Phylogenetic results considering all the analyzed ribosomal datasets and methods, showing the recovery of major clades in Cnidarian systematics proposals in our topologies and literature.

| Tree Topology (phylogenetic hypotheses)                  | Static homology strategy |     |         |         |          |       | Dynamic homology strategy |        |        |     |         |       |       |
|----------------------------------------------------------|--------------------------|-----|---------|---------|----------|-------|---------------------------|--------|--------|-----|---------|-------|-------|
|                                                          | ML (x4)                  |     | BY (x2) |         | MP (x30) |       | ML (x2)                   |        | BY     |     | MP(x18) |       |       |
|                                                          | 18S                      | 28S | 16S     | 18S     | 28S      | 18S   | 28S                       | 18S    | 28S    | 18S | 28S     | 18S   | 28S   |
| Anthozoa monophyletic                                    | (1,2,3)                  | YES | YES     | YES     | YES      | 2/30  | YES                       | (1)    | YES    | no  | YES     | 6/18  | YES   |
| <b>Ceriantharia sister group of rest of Hexacorallia</b> | no                       | no  | no      | no_poli | no       | no    | no                        | 2/30   | no     | no  | no      | no    | 4/18  |
| <b>Ceriantharia sister group of Octocorallia</b>         | no                       | YES | no      | no_poli | YES      | 1/30  | 19/30                     | no     | YES    | no  | YES     | no    | 9/18  |
| <b>Ceriantharia sister group of rest of Cnidaria</b>     | ali(4)                   | no  | no      | no_poli | no       | 27/30 | no                        | ali(2) | no     | YES | no      | 7/18  | no    |
| <b>Ceriantharia sister group of rest of Anthozoa</b>     | (1,2,3)                  | no  | YES     | no_poli | no       | no    | 6/30                      | (1)    | no     | no  | no      | 2/18  | 4/18  |
| Octocorallia monophyletic                                | YES                      | YES | YES     | YES     | YES      | 29/30 | YES                       | YES    | YES    | YES | YES     | 11/18 | YES   |
| Rest of the "Hexacorallia" clade monophyletic            | YES                      | YES | YES     | YES     | YES      | YES   | YES                       | YES    | YES    | YES | YES     | 14/18 | 15/18 |
| Octocorallia sister group of Medusozoa                   | ali(4)                   | no  | no      | no      | no       | 4/30  | no                        | ali(2) | no     | no  | no      | 4/18  | no    |
| Medusozoa monophyletic                                   | YES                      | YES | YES     | YES     | YES      | 28/30 | 26/30                     | YES    | YES    | YES | YES     | 11/18 | YES   |
| Staurozoa, Scyphozoa, Cubozoa and Hydrozoa monophyletic  | YES                      | YES | YES     | YES     | YES      | 23/30 | YES                       | YES    | YES    | YES | YES     | 11/18 | 16/18 |
| Staurozoa sister group of rest of Medusozoa              | no                       | YES | no      | no      | YES      | 1/30  | 24/30                     | ali(2) | ali(2) | no  | YES     | no    | 6/18  |
| Staurozoa sister group of Scyphozoa                      | (3) & ali(4)             | no  | no      | no      | no       | 4/30  | no                        | no     | no     | no  | no      | no    | no    |
| Staurozoa sister group of Cubozoa                        | (1,2)                    | no  | YES     | YES     | no       | 9/30  | no                        | (1)    | no     | YES | no      | 13/18 | no    |

Major results considering Ceriantharia's position are shown in blue or black font. Results are presented from the static and dynamic homology strategies, considering the 18S, 16S (no Ctenophora species in analysis) and 28S datasets. Static homology strategy, ML (x4) = Maximum Likelihood results considering 4 different analytical strategies: (1) MAFFT+RAxML, (2) RNAsalsa+RAxML (with and without secondary structure info included in these analysis), (3) gap coded as binary data matrix (RNAsalsa+FastGap+RAxML), (4): (ali: RNAsalsa+aliscore+RAxML); Static homology strategy, BY (x2) = Bayes results considering 2 different analytical strategies: (1) no gap coded (RNAsalsa+MrBayes), (2) gap coded (RNAsalsa+FastGap+MrBayes); Static homology strategy, MP = maximum parsimony results considering 30 different analytical strategies, being divided as 15 analyses with different cost weight regimes (3 of them treating gaps as missing data: RNAsalsa+TNT) and other 15 similar cost weight regimes, after alignment masking with (RNAsalsa+aliscore+TNT); Dynamic Homology strategy, ML (x2) = Maximum Likelihood results considering 2 different analytical strategies: (1) SATé (CLUSTALW+RAxML) and (2) a 18S filtered datamatrix (ali: RNAsalsa+aliscore+(SATé = MAFFT+RAxML)); Dynamic Homology strategy, BY = Bayes results from a dynamic homology analysis (BALI-Phy); no\_poli = basal polytomy in Anthozoa related to major recovered clades (Ceriantharia, Octocorallia and "Hexacorallia). In cases of all result/s being the considered hypotheses: YES (black box); most of results of the considered hypotheses were equal or >50% of total analyses: number of positive (dark grey); most of results considered the hypotheses were <50% of total analyses: number of positive results (light grey). doi:10.1371/journal.pone.0086612.t004

studies, where the monophyly of the group (and major lineages, like Anthozoa and Medusozoa) are compromised by potential incomplete taxon sampling [53–55]. From the current state of knowledge, it is possible to infer that Ceriantharia does not belong to Hexacorallia and thus represents a new subclass. However, the exact phylogenetic position of Ceriantharia is still debatable. Our study indicates that, based on a broader sampling of the group, Ceriantharia is most likely a sister group to Anthozoa. However, a sister-like relationship between Ceriantharia and Octocorallia

cannot be discarded and further analyses are needed to clarify this matter.

### Futures Prospects on Cnidarian mtDNA Evolutionary Genetics

A better understanding of the mechanisms related to the shifts of mtDNA evolutionary rates is a challenging task in current cnidarian studies [56–58]. There are several possible historical influences on qualitative aspects of mtDNA on this group, such as genome linearization and fragmentation, horizontal gene transfer from a non-bilaterian species (e.g., HGT, *mtMutS* gene), and gene arrangement (e.g., [59–61]). Recombination phenomena have been invoked to explain gene rearrangements in Octocorallia, and plasmid insertion to explain mtDNA linearization in Medusozoa [60]. The connection between genome components and rearrangements with mutation rates is not a trivial matter [62–65], as it is proposed to have been involved as one of the main mechanisms on evolutionary genetics of linear genomes [66]. Nonetheless, the theory of a mtDNA mismatch repair gene in Octocorallia as the mechanism explaining slow rates of genetic divergence does not explain the slow rates exhibited in Hexacorallia (Figures 1–3). This consideration reinforces the "classic" relationship proposed between Octocorallia and Hexacorallia lineages, differing from phylogenetic analyses based on mitochondrial data linking Octocorallia as sister group of Medusozoa (Anthozoa not monophyletic: [53]; [67]). Thus, more extensive studies on

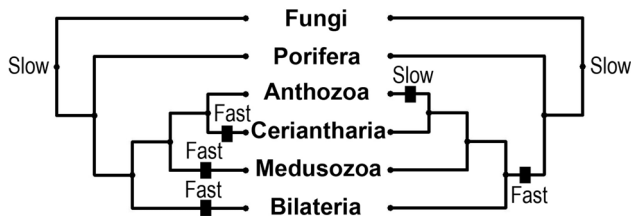

**Figure 5.** Graphic representation of possible evolutionary scenarios for slow mtDNA evolution in Anthozoa, modified from [39]. Scenario A: fast evolution originated in the Ceriantharia, Medusozoa and Bilateria independently (adapted from [43]). Scenario B: fast mtDNA evolved as a unique event (Cnidaria+Bilateria) but was subsequently lost in Anthozoa (not including Ceriantharia). doi:10.1371/journal.pone.0086612.g005

**Table 5.** Hypothesis testing results, considering Bayesian posterior probability calculated by the BIC approximation (PP) and results based on p-values; significance level result for AU (>0.05), rejecting the Hexacorallia clade in the traditional proposal remarked in blue).

| Phylogenetic hypotheses (18S datamatrix)             | AU           | PP           | KH           | SH           | WKH          | WSH          |
|------------------------------------------------------|--------------|--------------|--------------|--------------|--------------|--------------|
| <b>Ceriantharia sister group of rest of Anthozoa</b> | <b>0.861</b> | <b>0.901</b> | <b>0.812</b> | <b>0.846</b> | <b>0.812</b> | <b>0.844</b> |
| Ceriantharia sister group of Octocorallia            | <b>0.214</b> | <b>0.054</b> | 0.188        | 0.190        | 0.188        | 0.329        |
| Hexacorallia "monophyletic"                          | <b>0.151</b> | <b>0.045</b> | 0.169        | 0.173        | 0.169        | 0.306        |
| Phylogenetic hypotheses (16S datamatrix)             | AU           | PP           | KH           | SH           | WKH          | WSH          |
| <b>Ceriantharia sister group of rest of Anthozoa</b> | <b>0.760</b> | <b>0.953</b> | <b>0.746</b> | <b>0.825</b> | <b>0.746</b> | <b>0.799</b> |
| Ceriantharia sister group of Octocorallia            | <b>0.273</b> | <b>0.041</b> | 0.254        | 0.268        | 0.254        | 0.370        |
| Hexacorallia "monophyletic"                          | <b>0.035</b> | <b>0.06</b>  | 0.101        | 0.114        | 0.101        | 0.192        |
| Phylogenetic hypotheses (28S datamatrix)             | AU           | PP           | KH           | SH           | WKH          | WSH          |
| <b>Ceriantharia sister group of Octocorallia</b>     | <b>0.873</b> | <b>1.0</b>   | <b>0.871</b> | <b>0.93</b>  | <b>0.871</b> | <b>0.909</b> |
| Ceriantharia sister group of rest of Anthozoa        | <b>0.137</b> | <b>0.0</b>   | 0.13         | 0.132        | 0.129        | 0.208        |
| Hexacorallia "monophyletic"                          | <b>0.003</b> | <b>0.0</b>   | 0.021        | 0.022        | 0.021        | 0.045        |

The original phylogenetic results from these datasets and their results, as well main results from the approximately unbiased test (AU, non parametric test) and posterior probabilities values (PP, parametric test) are shown in bold. The 18S and 28S datasets were aligned with RNAsalsa and 16S dataset (no Ctenophora species in analysis) was aligned with MAFFT, with no data masking in all cases. Other tests: Kishino-Hasegawa test (KH); Shimodaira-Hasegawa test (SH); weighted Kishino-Hasegawa test (WKH); weighted Shimodaira-Hasegawa test (WSH).

doi:10.1371/journal.pone.0086612.t005

mitochondrial genome arrangement and how it is related to mutation/evolutionary patterns are needed in Hexacorallia. Additional efforts should also be undertaken to increase ceriantharian taxon sampling, evaluation of different cnidarian outgroups (e.g., Porifera vs Ctenophora), together with a thorough evaluation of (1) data treatment to define homology, (2) reconstruction parameters and methods, (3) nodal support, (4) hypotheses testing and the (5) recovered phylogenetic signal (e.g. [68–69]; [34]).

Recently [70] suggested that almost 90% of the Ceriantharia species are already known. However the authors neglected to address the existence of cryptic species, species with disjunct distributions (e.g. *Cerianthomorpha brasiliensis*, *Cerianthopsis americanus*), and oceanic areas with no data (e.g. deep sea); additionally, the evolutionary position of Ceriantharia should be clarified because of their possible reflection of basal adaptive radiation in cnidarians, considering their asymmetric conditions on sister clades, based on (1) number of extinct derived species, (2) genetic divergence and (3) morphological-ecological traits, that altogether could represent signals of adaptative events [67] [71]. Finally, we emphasize that the inclusion of Ceriantharia in Hexacorallia should no longer be accepted and this group should be elevated to subclass.

**Thus the class Anthozoa should be divided into three subclasses;**

- **Hexacorallia,**
- **Octocorallia**
- **Ceriantharia subclass nov.**

## Supporting Information

**Figure S1 ML cladogram of Cnidaria based on a combined dataset (18S+16S ribosomal molecular markers partitions).** Supports values are aBAYES and aLRT (parametric, upper branch) together with BS and SH-like (non

parametric, lower branch) in clockwise direction. Each dataset was aligned in MAFFT and phylogeny estimated in RAxML (independent branch length calculated for every molecular marker partition); support values were calculated in RAxML (BS) and PhyML. Data treatment and basic parameters (e.g., number of replicates) were similar to individual ML analysis for 18S dataset (MAFF+RAxML analysis; see Table S2 for details in datamatrices, software and parameters).

(TIF)

**Figure S2 ML phylograms of evolutionary relationships presented in figure 3, considering ribosomal molecular markers analysis (A: nuclear 18S; B: mitochondrial 16S (no Ctenophora species in analysis); C: nuclear 28S).**

(TIF)

**Figure S3 ML phylograms from different analysis datasets for cytochrome oxidase I (COI) cnidarian sequences estimated in Garli (100 replicates; [72]).**

Partition analysis with PartitionFinder [73] defined two basic partitions as optimal to estimate gene phylogeny for COI (all codon positions): first and second position (partition 1, model TVM+G) and third position (partition 2, model SYM+G); then both partitions (Figure A) and partition 1 only (Figure B) were analyzed. Trying to overcome molecular saturation (non-phylogenetic related heterogeneity), the COI dataset was filtered at two different intensity levels: treating gaps as missing data ("Aliscore -N" strategy; Figure C) and a more intense approach ("Aliscore -N -r -w4"; Figure D). The COI dataset (Genbank IDs presented in terminal's names) was originally aligned in MAFFT (codon frame checked); the root position was defined *a posteriori* (random position; no effect on ML analysis).

(TIF)

**Table S1 List of DNA sequences species used in this study considering the 18S, 28S and 16S datasets (new sequences remarked in blue).**

(XLSX)



**Table S2 Software and analytic details (data treatment and parameters) for every analysis applied in this study for 18S and 28S datasets (see Table 4 for major results compilation).**

(XLSX)

**Table S3 Results from TNT analysis (18S and 28S datasets), considering original and masked alignments (RNAsalsa+aliscore), in all analyzed cost weight transformations (indel:transitions:transversions).**

(XLSX)

**Text S1 Discussion on evolution and previous systematic considerations of Ceriantharia and Anthozoa.**

(DOCX)

## References

1. Hebert PDN, Ratnasingham S, deWaard JR (2003) Barcoding animal life: cytochrome c oxidase subunit 1 divergences among closely related species. *Proc Biol Sci* 270 Suppl 1: 96–99.
2. Ortmann BD, Bucklin A, Pagès F, Youngbluth M (2010) DNA barcoding the Medusozoa using mtCOI. *Deep Sea Res Part 2 Top Stud Oceanogr* 57: 2148–2156.
3. Shearer TL, van Oppen MJH, Romano SL, Wörheide G (2002) Slow mitochondrial DNA sequence evolution in the Anthozoa (Cnidaria). *Mol Ecol* 11, 2475–2487.
4. Shearer TL, Coffroth Ma (2008) DNA BARCODING: Barcoding corals: limited by interspecific divergence, not intraspecific variation. *Mol Ecol Resour* 8: 247–255.
5. Pont-Kingdon GA, Okada NA, Macfarlane JL, Beagley CT, Wolstenholme DR, et al. (1995) A coral mitochondrial MutS gene. *Nature* 375: 109–111.
6. Pont-Kingdon G, Okada NA, Macfarlane JL, Beagley CT, Watkins-Sims CD, et al. (1998) Mitochondrial DNA of the coral *Sarcophyton glaucum* contains a gene for a homologue of bacterial MutS: a possible case of gene transfer from the nucleus to the mitochondrion. *J Mol Evol* 46, 419–431.
7. Culligan KM, Meyer-Gauen G, Lyons-Weiler J, Hays JB (2000) Evolutionary origin, diversification and specialization of eukaryotic MutS homolog mismatch repair proteins. *Nucl Acids Res* 28: 463–471.
8. France SC, Hoover LC (2001) Analysis of variation in mitochondrial DNA sequences (ND3, ND4L, MSH) among Octocorallia (= Alcyonaria) (Cnidaria: Anthozoa). *Bull Biol Soc Wash* 10: 110–118.
9. McFadden CS, France SC, Sánchez JA, Alderslade P (2006) A molecular phylogenetic analysis of the Octocorallia (Cnidaria: Anthozoa) based on mitochondrial protein-coding sequences. *Mol Phylogenet Evol* 41: 513–527.
10. Bridge D, Cunningham CW, DeSalle R, Buss LW (1995) Class-level relationships in the phylum Cnidaria: molecular and morphological evidence. *Mol Biol Evol* 12: 679–69.
11. Collins AG, Schuchert P, Marques AC, Jankowski T, Medina M, et al. (2006) Medusozoan phylogeny and character evolution clarified by new large and small subunit rDNA data and an assessment of the utility of phylogenetic mixture models. *Syst Biol* 55: 97–115.
12. Ogata H, Ray J, Toyoda K, Sandaa RA, Nagasaki K, et al. (2011) Two new subfamilies of DNA mismatch repair proteins (MutS) specifically abundant in the marine environment. *ISME Journal* 5: 1143–1151.
13. Stampar SN, Maronna MM, Vermeij MJA, Silveira FLd, Morandini AC (2012) Evolutionary diversification of banded tube-dwelling anemones (Cnidaria; Ceriantharia; *Isarachnanthus*) in the Atlantic Ocean. *PLoS ONE* 7: e41091.
14. Chen CA, Odorico DM, Lohuis M, Veron JEN, Miller DJ (1995) Systematic relationships within the Anthozoa (Cnidaria: Anthozoa) using the 5'-end of the 28S rDNA. *Mol Phylogenet Evol* 4: 175–183.
15. Won JH, Rho BJ, Song JI (2001) A phylogenetic study of the Anthozoa (phylum Cnidaria) based on morphological and molecular characters. *Coral Reefs* 20: 39–50.
16. Vandamme AM (2009) Basic concepts of molecular evolution, in: Lemey, P, Salemi, M, Vandamme, A-M, (Eds). *The Phylogenetic Handbook*. 2 ed Cambridge University Press, New York, 3–32.
17. Cruickshank RH (2002) Molecular markers for the phylogenetics of mites and ticks. *Syst Appl Acarol* 7: 3–14.
18. Higgins D, Lemey P (2009) Multiple sequence alignment, in: Lemey, P, Salemi, M, Vandamme, A-M (eds). *The Phylogenetic Handbook*. 2 ed Cambridge University Press, New York, 68–108.
19. Folmer O, Black M, Hoch W, Lutz R, Vrijenhoek R (1994) DNA primers for amplification of mitochondrial Cytochrome C Oxidase subunit I from diverse metazoan invertebrates. *Mol Mar Biol Biotech* 3: 294–299.
20. Prendini L, Weygoldt P, Wheeler WC (2005) Systematics of the *Damon variegatus* group of African whip spiders (Chelicerata: Amblypygi): evidence from behaviour, morphology and DNA. *Org Div Evol* 5: 203–236.
21. Dawson MN (2005) Renaissance taxonomy: integrative evolutionary analyses in the classification of Scyphozoa. *J Mar Biol Assoc UK* 85: 733–739.
22. Cunningham CW, Buss LW (1993) Molecular evidence for multiple episodes of pedomorphosis in the family Hydractiniidae. *Biochem Syst Ecol* 21: 57–69.
23. Schroth W, Jarms G, Streit B, Schierwater B (2002) Speciation and phylogeography in the cosmopolitan marine moon jelly, *Aurelia* sp. *BMC Evol Biol* 2: 1–10.
24. Apakupakul K, Siddall ME, Burrenson EM (1999) Higher level relationships of leeches (Annelida, Clitellata, Euhirudinea) based on morphology and gene sequences. *Mol Phylogenet Evol* 2: 350–359.
25. Medina M, Collins AG, Silberman JD, Sogin ML (2001) Evaluating hypotheses of basal animal phylogeny using complete sequences of large and small subunit rRNA. *P Natl Acad Sci-Biol* 98: 9707–9712.
26. Lecière L, Schuchert P, Cruaud C, Couloux A, Manuel M (2009) Molecular phylogenetics of Thecata (Hydrozoa, Cnidaria) reveals long-term maintenance of life history traits despite high frequency of recent character changes. *Syst Biol* 58: 509–526.
27. Voigt O, Collins AG, Pearse VB, Pearse JS, Ender A, et al. (2004) Placozoa no longer a phylum of one. *Curr Biol* 14: R944–R945.
28. Molodtsova TN (2004) On the taxonomy and presumable evolutionary pathways of planktonic larvae of Ceriantharia (Anthozoa, Cnidaria). *Hydrobiologia* 530/531: 261–266.
29. Tamura K, Peterson D, Peterson N, Stecher G, Nei M, et al. (2011) MEGA5: Molecular Evolutionary Genetics Analysis using Maximum Likelihood, Evolutionary Distance, and Maximum Parsimony Methods. *Mol Biol Evol* 28: 2731–2739.
30. Katoh K, Asimenos G, Toh H (2009) Multiple alignment of DNA sequences with MAFFT. *Methods Mol Biol* 537: 39–64.
31. Stocsits RR, Letsch H, Hertel J, Misof B, Stadler PF (2009) Accurate and efficient reconstruction of deep phylogenies from structured RNAs. *Nucleic Acids Res* 37: 6184–6193.
32. Suchard MA, Redelings BD (2006) BAli-Phy: simultaneous Bayesian inference of alignment and phylogeny. *Bioinformatics* 22 (16): 2047–2048.
33. Wheeler TJ, Kececioglu JD (2007) Multiple alignment by aligning alignments. *Bioinformatics* 23 (13): i559–i568.
34. Liu K, Warnow TJ, Holder MT, Nelesen SM, Yu J, et al. (2012) SATé-II: Very Fast and Accurate Simultaneous Estimation of Multiple Sequence Alignments and Phylogenetic Trees. *Syst Biol* 61 (1): 90–106.
35. Varón A, Vinh LS, Wheeler WC (2010) POY version 4: phylogenetic analysis using dynamic homologies. *Cladistics* 26 (1): 72–85.
36. Borchsenius F (2009) FastGap 1.2. Available: [http://www.aubot.dk/FastGap\\_home.htm](http://www.aubot.dk/FastGap_home.htm).
37. Kück P, Meusemann K, Dambach J, Thormann B, von Reumont BM, et al. (2010) Parametric and non-parametric masking of randomness in sequence alignments can be improved and leads to better resolved trees. *Front Zool* 7: 10.
38. Stamatakis A (2006) RAXML-VI-HPC: maximum likelihood-based phylogenetic analyses with thousands of taxa and mixed models. *Bioinformatics* 22: 2688–2690.
39. Ronquist F, Teslenko M, van der Mark P, Ayres DL, Darling A (2012) MrBayes 3.2: efficient Bayesian phylogenetic inference and model choice across a large model space. *Syst Biol* 61(3): 539–542.
40. Goloboff PA, Farris JS, Nixon KC (2008) TNT, a free program for phylogenetic analysis. *Cladistics* 24: 774–786.
41. Anisimova M, Gascuel O (2006) Approximate likelihood-ratio test for branches, A fast, accurate, and powerful alternative. *Syst Biol* 55: 539–552.
42. Anisimova M, Gil M, Dufayard J-F, Dessimoz C, Gascuel O (2011) Survey of branch support methods demonstrates accuracy, power, and robustness of fast likelihood-based approximation schemes. *Syst Biol* 60: 685–699.
43. Guindon S, Dufayard J-F, Lefort V, Anisimova M, Hordijk W, et al. (2010) New algorithms and methods to estimate maximum-likelihood phylogenies: assessing the performance of PhyML 3.0. *Syst Biol* 59: 307–321.
44. López-Giraldez F, Townsend JP (2011) PhyDesign: an online application for profiling phylogenetic informativeness. *BMC Evol Biol* 11: 152.

## Acknowledgments

We are deeply indebted to Dr. Fábio L. da Silveira for providing laboratory facilities and comments during the development of the study. We are grateful to Drs. Peter Wirtz, Gustav Paulay, Elizabeth G. Neves, Mark Vermeij, Alvaro E. Migotto, Kennet Lundin and Chaolun Allen Chen for providing specimens for this study. We are also thankful to Dr. Estefania Rodriguez for providing some DNA sequences.

## Author Contributions

Conceived and designed the experiments: SNS MMM ACM. Performed the experiments: SNS MMM. Analyzed the data: SNS MMM MVK\_JDR ACM. Contributed reagents/materials/analysis tools: SNS MMM ACM. Wrote the paper: SNS MMM MVK\_JDR ACM.

45. Schmidt HA (2009) Testing Tree Topologies. In P. Lemey, M. Salemi, A.M. Vandamme (eds.) *The Phylogenetic Handbook: a Practical Approach to Phylogenetic Analysis and Hypothesis Testing.*, 2nd Edition, Cambridge University Press, Cambridge, 381–404.
46. Brown WM, George M Jr, Wilson AC (1979) Rapid evolution of animal mitochondrial DNA. *P Natl Acad Sci-Biol* 76: 1967–1971.
47. Ferris SD, Sage RD, Prager EM, Ritte U, Wilson AC (1983) Mitochondrial DNA evolution in mice. *Genetics* 105: 681–721.
48. Higuchi R, Bowman B, Freiberger M, Ryder OA, Wilson AC (1984) DNA sequences from the quagga, and extinct member of the horse family. *Nature* 312: 282–284.
49. Wilson AC, Cann RL, Carr SM, Georgej M, Gyllensten UB (1985) Mitochondrial DNA and two perspectives on evolutionary genetics. *Biol J Linn Soc* 26: 375–400.
50. Huang D, Meier R, Todd PA, Chou LM (2008) Slow mitochondrial COI sequence evolution at the base of the metazoan tree and its implications for DNA barcoding. *J Mol Evol* 66: 167–174.
51. France SC, Rosel PE, Agenbroad JE, Mullineaux LS, Kocher TD (1996) DNA sequence variation of mitochondrial large-subunit rRNA provides support for a two-subclass organization of the Anthozoa (Cnidaria). *Mol Mar Biol Biotech* 5: 15–28.
52. Daly M, Fautin DG, Cappola VA (2003) Systematics of the Hexacorallia (Cnidaria: Anthozoa). *Zool J Linn Soc-Lond* 139: 419–437.
53. Kayal E, Roure B, Philippe H, Collins AG, Lavrov DV (2013) Cnidarian phylogenetic relationships as revealed by mitogenomics. *BMC Evol Biol* 13: 5.
54. Osigus HJ, Eitel M, Bernt M, Donath A, Schierwater B (2013) Mitogenomics at the base of Metazoa. *Mol Phylogenet Evol* 69(2): 339–351.
55. Bernt M, Bleidorn C, Braband A, Dambach J, Donath A et al. (2013) A comprehensive analysis of bilaterian mitochondrial genomes and phylogeny. *Mol Phylogenet Evol* 69(2): 352–364.
56. Schierwater B, Stadler P, Desalle R, Podsiadlowski L (2013) Mitogenomics and metazoan evolution. *Mol Phylogenet Evol* 69(2): 311–312.
57. Bernt M, Braband A, Schierwater B, Stadler PF (2013) Genetic aspects of mitochondrial genome evolution. *Mol Phylogenet Evol* 69(2): 328–338.
58. Ghiselli F, Milani L, Guerra D, Chang PL, Breton S, et al. (2013) Structure, transcription, and variability of metazoan mitochondrial genome: perspectives from an unusual mitochondrial inheritance system. *Genome Biol Evol* 5(8): 1535–1554.
59. Bilewicz JP, Degnan SM (2011) A unique horizontal gene transfer event has provided the octocoral mitochondrial genome with an active mismatch repair gene that has potential for an unusual self-contained function. *BMC Evol Biol* 11: 228.
60. Kayal E, Bentlage B, Collins AG, Kayal M, Pirro S (2011) Evolution of linear mitochondrial genomes in medusozoan cnidarians. *Genome Biol Evol* 4: 1–12.
61. Brockman Sa, McFadden CS (2012) The mitochondrial genome of *Paraminabea aldersladei* (Cnidaria: Anthozoa: Octocorallia) supports intramolecular recombination as the primary mechanism of gene rearrangement in octocoral mitochondrial genomes. *Genome Biol Evol* 4: 882–894.
62. Venton D (2013) Highlight: the mystery of mitochondrial genomes. *Genome Biol Evol* 5 (6): 1115–1116.
63. Kohn AB, Citarella MR, Kocot KM, Bobkova YV, Halanych KM, et al. (2012) Rapid evolution of the compact and unusual mitochondrial genome in the ctenophore, *Pleurobrachia bachei*. *Mol Phylogenet Evol* 63(1): 203–207.
64. Pett WJ, Ryan F, Pang K, Mullikin JC, Martindale MQ, et al. (2011) Extreme mitochondrial evolution in the ctenophore *Mnemiopsis leidyi*: Insight from mtDNA and the nuclear genome. *Mitochondrial DNA* 22(4): 130–142.
65. Dellaporta SL, Xu A, Sagasser S, Jakob W, Moreno MA, et al. (2006) Mitochondrial genome of *Trichoplax adhaerens* supports placozoa as the basal lower metazoan phylum. *Proc Natl Acad Sci USA* 103(23): 8751–8756.
66. Smith DR, Keeling PJ (2013) Gene conversion shapes linear mitochondrial genome architecture. *Genome Biol Evol* 5(5): 905–912.
67. Park E, Hwang D-S, Lee J-S, Song J-I, Seo T-K, et al. (2012) Estimation of divergence times in cnidarian evolution based on mitochondrial protein-coding genes and the fossil record. *Mol Phylogenet Evol* 62: 329–345.
68. Anisimova M, Liberles DA, Philippe H, Provan J, Pupko T, et al. (2013) State-of-the-art methodologies dictate new standards for phylogenetic analysis. *BMC Evol Biol* 13: 161.
69. Lee MS, Hugall AF (2003) Partitioned likelihood support and the evaluation of data set conflict. *Syst Biol* 52: 15–22.
70. Appeltans W, Ah Yong ST, Anderson G, Angel MV, Artois T, et al. (2012) The magnitude of global marine species diversity. *Curr Biol* 22(23): 2189–2202.
71. Glor RE (2010) Phylogenetic insights on adaptive radiation. *Annu Rev Ecol Evol Syst* 41: 251–270.
72. Zwickl DJ (2006) Genetic algorithm approaches for the phylogenetic analysis of large biological sequence datasets under the maximum likelihood criterion. Ph.D. dissertation, The University of Texas at Austin.
73. Lanfear R, Calcott B, Ho SY, Guindon S (2012) Partitionfinder: combined selection of partitioning schemes and substitution models for phylogenetic analyses. *Mol Biol Evol* 29(6): 1695–1701.
